# Supplementary material for: Effects of Absorption Kinetics on the Catabolism of Melatonin Released from CAP-Coated Mesoporous Silica Drug Delivery Vehicles
Source: MDPI journal article supplement (doi:10.3390/pharmaceutics13091436), 2021-09-09
Supplement: s1 [file s1]

# Supplementary Materials: Effects of Absorption Kinetics on the Catabolism of Melatonin Released from CAP-Coated Mesoporous Silica Drug Delivery Vehicles

Irene Moroni and Alfonso Garcia-Bennett

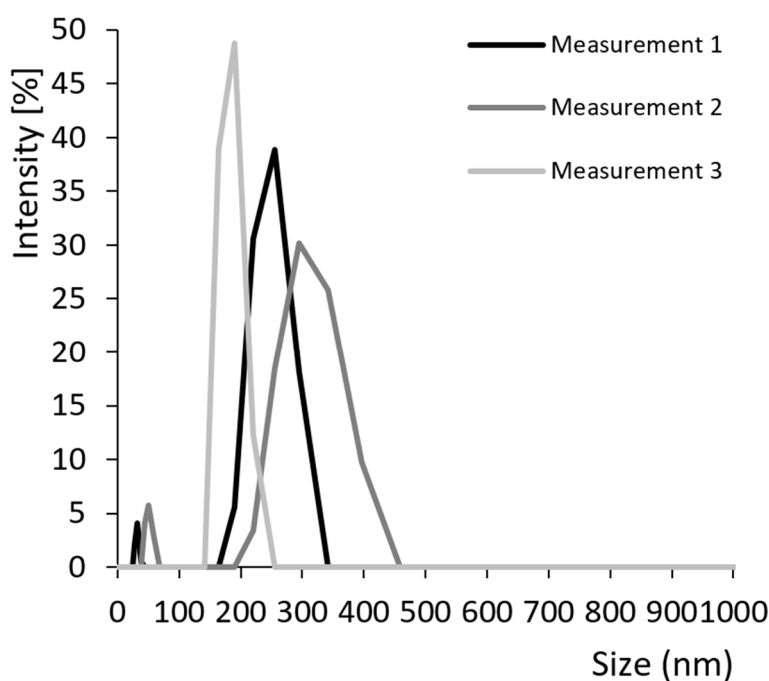

(a)

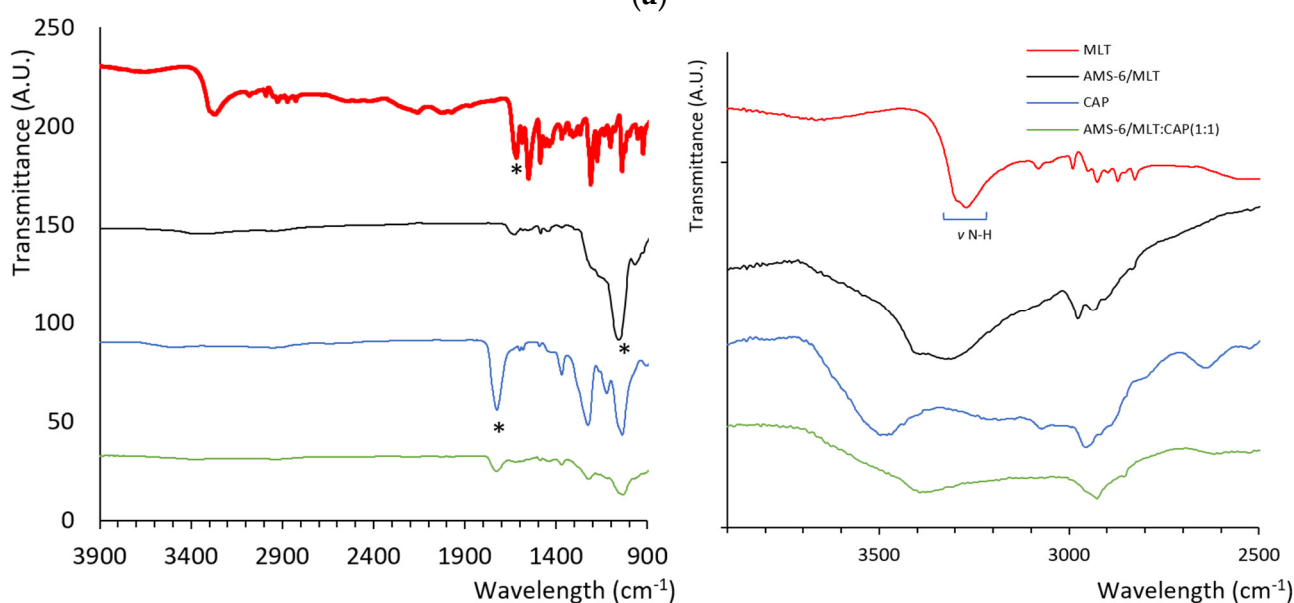

(b)

**Figure S1.** (a) DLS hydrodynamic particle size distribution of calcined AMS-6 particles in water, with an average value of  $246.7 \pm 62.6$  nm. (b) FT-IR spectra of MLT and formulations prepared in this manuscript. Asterisk's mark stretching frequencies for signature bonds in each spectrum. An enlarged area of the region between 2000-4000  $\text{cm}^{-1}$  is shown on the left.

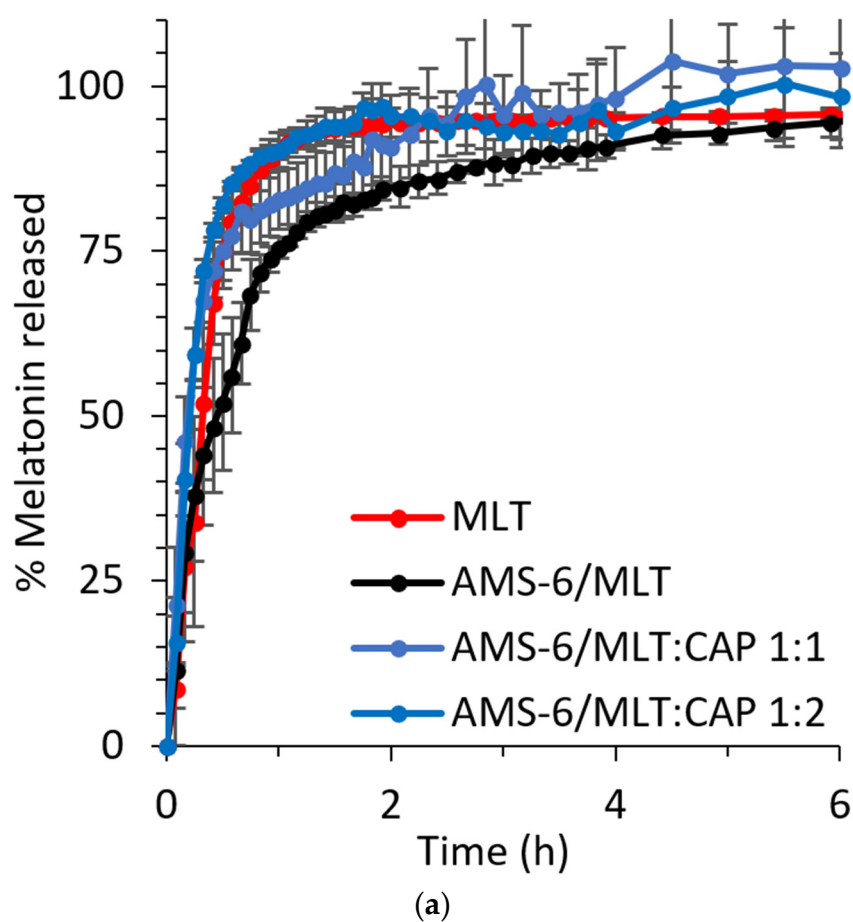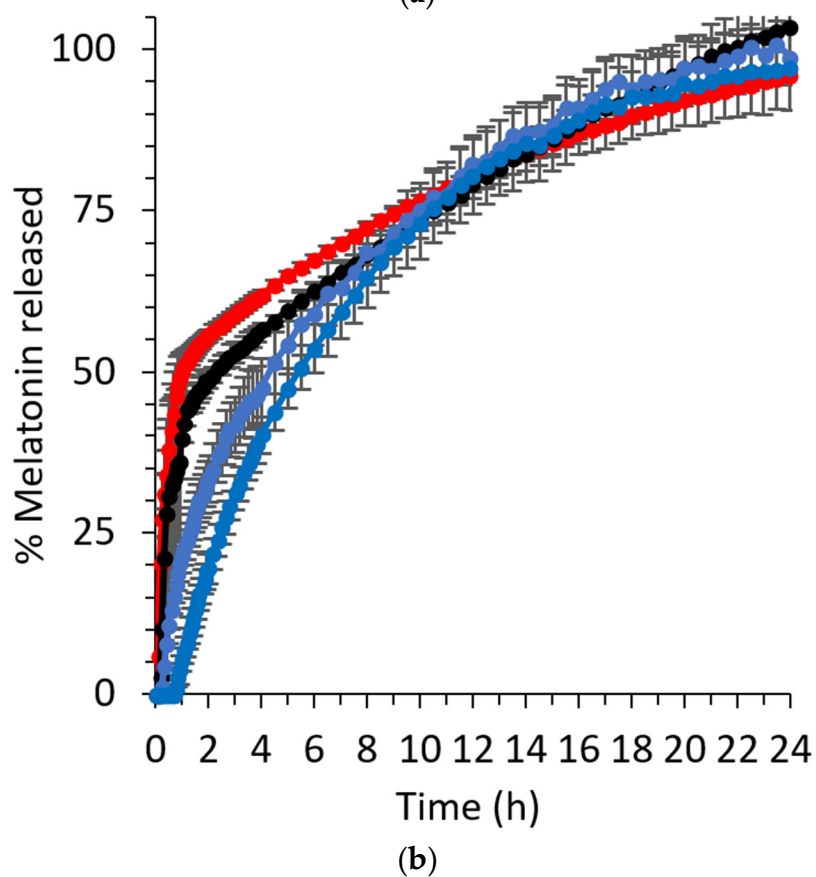

**Figure S2.** (a) Kinetic release measurements of MLT and test formulations in SIF (pH 6.8) and (b) SGF (pH 1.2).
